# Supplementary material for: Copolymer of VDF/TFE as a Promising Polymer Additive for CsH2PO4-Based Composite Electrolytes
Source: MDPI journal article supplement (doi:10.3390/membranes13050520), 2023-05-17
Supplement: s1 [file s1]

# Copolymer of VDF/TFE as a promising polymer additive for CsH<sub>2</sub>PO<sub>4</sub>-based composite electrolytes

<sup>1,2</sup>Yuri Kungurtsev, <sup>1,2</sup>Irina Bagryantseva, <sup>1</sup>Valentina Ponomareva\*

<sup>1</sup> Institute of Solid State Chemistry and Mechanochemistry SB RAS, Russia, Novosibirsk

<sup>2</sup> Novosibirsk State University, Russia, Novosibirsk

\* Correspondence: [ponomareva@solid.nsc.ru](mailto:ponomareva@solid.nsc.ru)

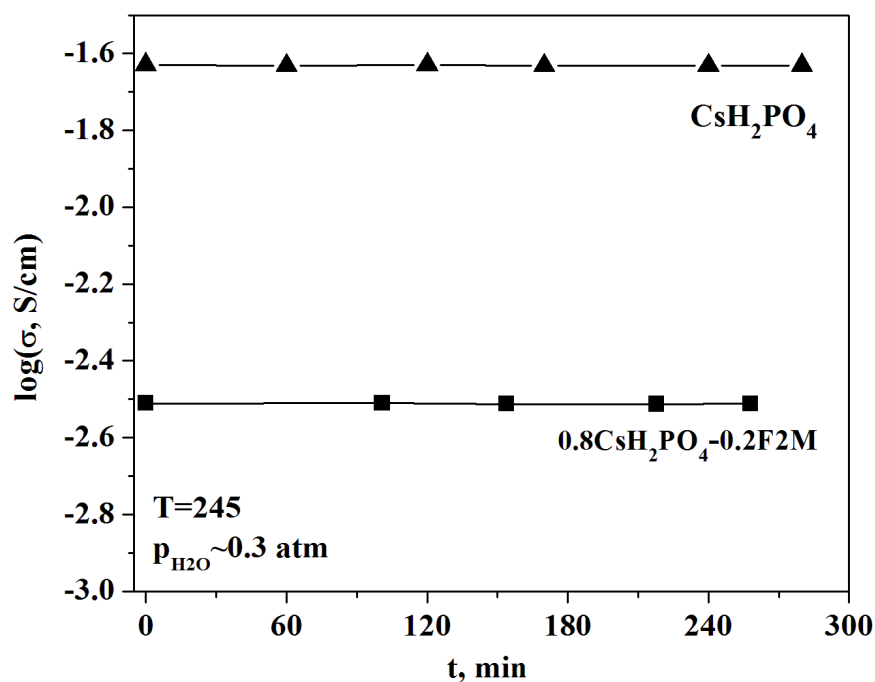

**Figure S1.** The conductivity dependence as a function of the time holding at  $T=245^\circ\text{C}$ .

The storage of the sample  $x=0.2$  at the high temperatures ( $T=245^\circ\text{C}$ ,  $p_{\text{H}_2\text{O}} \sim 0.3 \text{ atm}$ ) for  $\sim 4$  hours shows the short term stability of the proton conductivity values for the membranes. The PXRD of the used samples also confirmed the immutability of the structural properties of  $\text{CsH}_2\text{PO}_4$ -F-2M polymer systems.
